# Supplementary material for: CoO–carbon nanofiber networks prepared by electrospinning as binder-free anode materials for lithium-ion batteries with enhanced properties
Source: Royal Society of Chemistry journal article supplement (doi:10.1039/c3nr03931e), 2013-01-01
Supplement: c3nr03931e.pdf [file c3nr03931e.pdf]

## **CoO-carbon nanofiber networks prepared by electrospinning as binder-free anode materials for lithium-ion batteries with enhanced properties**

Ming Zhang,<sup>a,b</sup> Evan Uchaker,<sup>a</sup> Shan Hu,<sup>a</sup> Qifeng Zhang,<sup>a</sup> Taihong Wang,<sup>a\*</sup>  
Guozhong Cao,<sup>b\*</sup> and Jiangyu Li<sup>c</sup>

<sup>a</sup> *Key Laboratory for Micro-Nano Optoelectronic Devices of Ministry of Education, State Key Laboratory for Chemo/Biosensing and Chemometrics, Hunan University, Changsha, 410082, P. R. China. E-mail: [thwang@hnu.edu.cn](mailto:thwang@hnu.edu.cn) ; Fax: +86 731 88822332; Tel: +86 731 88822332*

<sup>b</sup> *Department of Materials Science & Engineering, University of Washington, Seattle, Washington, 98195, USA. E-mail: [gzcao@u.washington.edu](mailto:gzcao@u.washington.edu) ; Fax: +1 206 543 3100; Tel: +1 206 616 9084*

<sup>c</sup> *Department of Mechanical Engineering, University of Washington, Seattle, Washington 98195-2600, USA.*

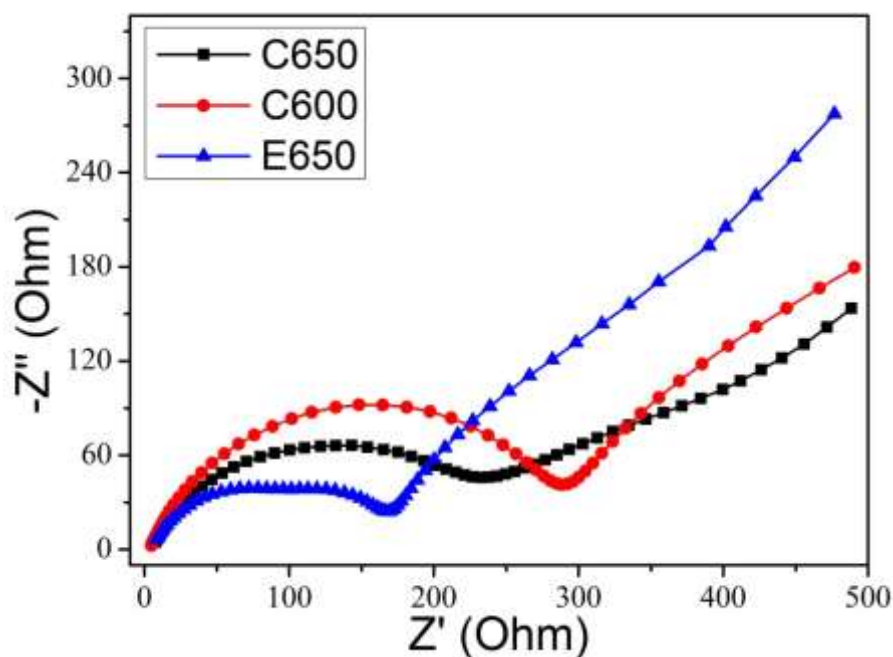

**Fig. S1** AC impedance spectra of the coin cells after the rate capacity test.

The intercept on the  $Z$  real axis in the high-frequency range corresponds to the resistance of the electrolyte ( $R_e$ ) (high-frequency).  $R_{ct}$  is the charge-transfer resistance (medium-frequency). The sloping line at the low-frequency range represents the Warburg impedance ( $Z_w$ ). As shown in Fig. S1, the  $R_e$  of the three samples (C650, C600, and E650) are about 4.5  $\Omega$ , showing the consistency of electrolyte. The  $R_{ct}$  of the sample E650 is the smallest one among them, and the  $R_{ct}$  of the sample C600 is the largest one in the three samples. The  $R_e$  of E650 is lower than that of C650, demonstrating that the conductivity of carbon nanofibers is higher than that of CoO. However, the theoretical capacity of CoO is higher than that of carbon. Therefore, the rate capacity of C650 is high that of E650. The lower  $R_e$  of C650 arising from the higher annealed temperature results in that the rate capacity of C650 is higher than that of C600.
